# Supplementary material for: Late Pleistocene to Holocene climate and limnological changes at Lake Karakul (Pamir Mountains, Tajikistan)
Source: Copernicus journal article supplement (doi:10.5194/cp-2016-34), 2016-04-07
Supplement: Supplementary file 1 [file cp-2016-34-supplement.pdf]

## Supplement Material

**Table S1: Location and type of environment for reference samples collected in 2012 north-east of Lake Karakul.**

| Sample | Elevation (m asl) | Latitude (°N) | Longitude (°E) | Type of Environment                            |
|--------|-------------------|---------------|----------------|------------------------------------------------|
| 1      | 3949              | 39.04457      | 73.59273       | dry river channel                              |
| 2      | 3947              | 39.06448      | 73.59615       | former lake sediment                           |
| 3      | 3947              | 39.06448      | 73.59615       | former lake sediment                           |
| 4      | 3932              | 39.07642      | 73.58897       | modern pond                                    |
| 5      | 3968              | 39.09715      | 73.58402       | recent aeolian sand                            |
| 6      | 3965              | 39.14516      | 73.53809       | dry river channel                              |
| 7      | 3965              | 39.14702      | 73.53277       | dry river channel                              |
| 8      | 3962              | 39.14986      | 73.52621       | slack water silt/slowly flowing seasonal river |
| 9      | 4027              | 39.16245      | 73.49361       | dry river channel                              |

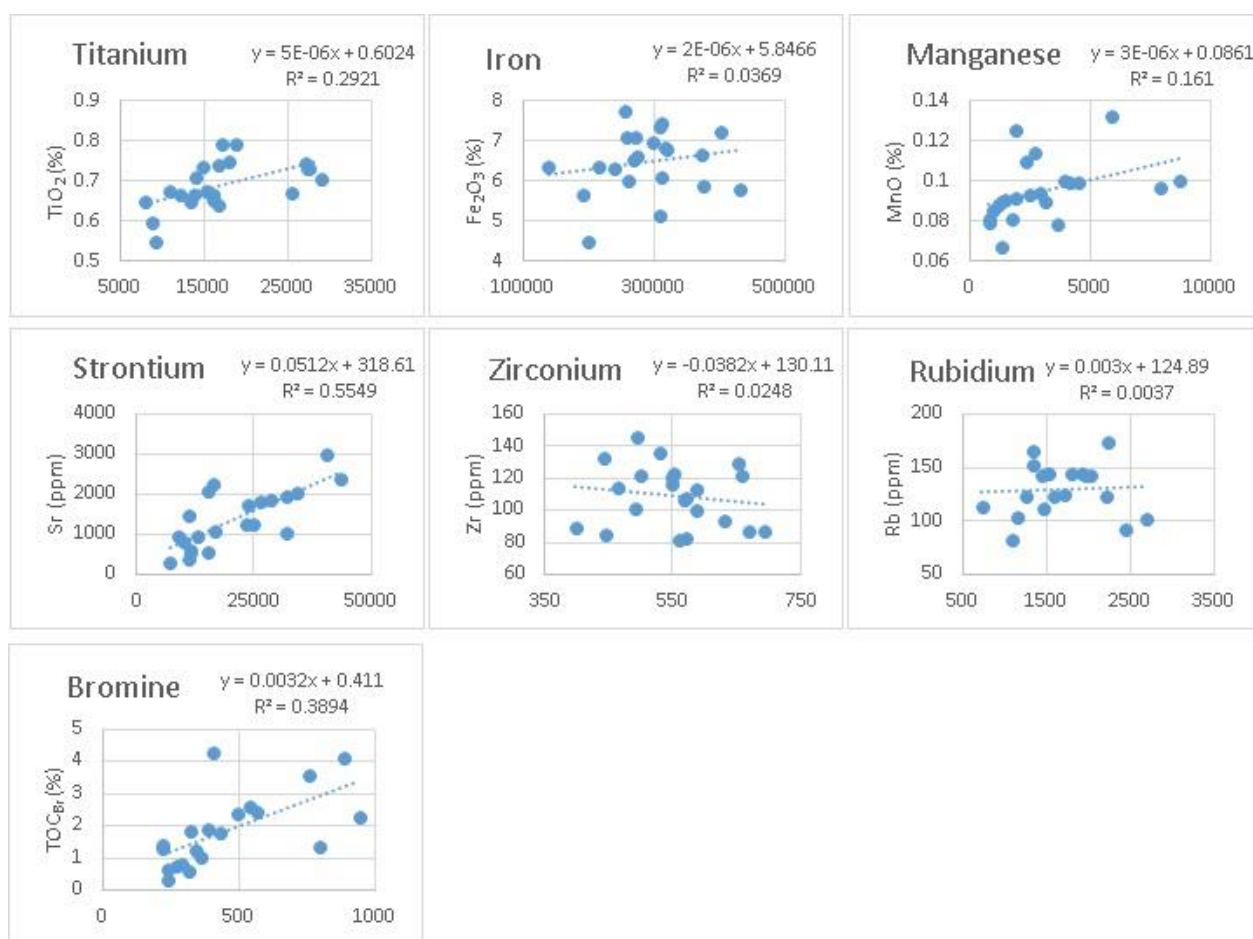

**Figure S1: Cross-plots of x-ray fluorescence (XRF) scanner data, averaged over each cm, and XRF single sample measurements for calibration. The coefficient of determination is given in  $R^2$  for each plot, x-axis are given in counts per second (cps).**

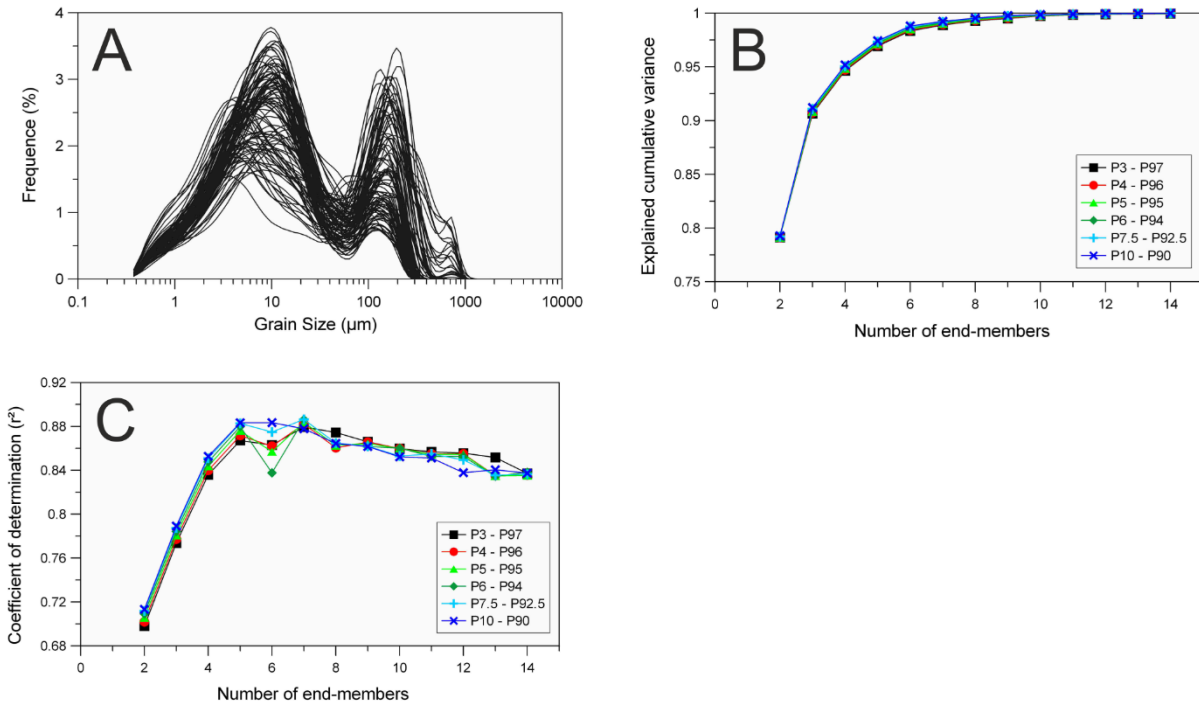

**Figure S2: Grain-size distribution and end-member modelling analysis (EMMA) results for core KK12-1. A - Grain-size distribution of 101 measured samples, B - Explained cumulative variance, C - The main coefficient of determination ( $r^2$ ) as a function of the number of end-members reflects the stability of the model and defines the maximum number of end-members at the maximum of  $r^2$ .**
